1 An Efficient and Robust Approach to Detect Auditory Evoked Brainstem Responses  
2 by Progressive Sub-average Cross-covariance Analysis

3  
4 Haoyu Wang<sup>1-4#</sup>, Bei Li<sup>1#</sup>, Xu Ding<sup>2-3#</sup>, Xueling Wang<sup>1-3</sup>, Zhiwu Huang<sup>1-3</sup>, Yunfeng  
5 Hua<sup>1-4\*</sup>, Hao Wu<sup>1-4\*</sup>

6  
7 <sup>1</sup>Department of Otolaryngology-Head and Neck Surgery, Shanghai Ninth People's  
8 Hospital, Shanghai Jiao Tong University School of Medicine, Shanghai, China

9 <sup>2</sup>Ear Institute, Shanghai Jiao Tong University School of Medicine, Shanghai, China

10 <sup>3</sup>Shanghai Key Laboratory of Translational Medicine on Ear and Nose Diseases,  
11 Shanghai, China

12 <sup>4</sup>Shanghai Institute of Precision Medicine, Shanghai Ninth People's Hospital,  
13 Shanghai, China

14 # These authors contributed equally to this work

15 \* Corresponding authors. E-mail: [yunfeng.hua@outlook.com](mailto:yunfeng.hua@outlook.com) (Y.H.) and  
16 [haowu@sh-jei.org](mailto:haowu@sh-jei.org) (H.W.)

17

18 **Abstract**

19 **Objective:** Auditory brainstem response (ABR) is widely employed to assess  
20 auditory function of humans and lab animals. Despite attempts to automation, ABR  
21 threshold determination still relies on human visual inspection on average responses.  
22 The aim of this study is to develop a robust procedure for automatic and accurate  
23 threshold determination.

24 **Design:** Signal lag of maximal cross-covariance between sub-averaged sweeps was  
25 utilized to test the existence of time-locked components during progressive averaging  
26 by iterations. The minimal number of iterations required to reach the critical lag value  
27 versus sound level series was modeled to inform the estimation of ABR threshold.

28 **Study Sample:** Test datasets containing single ABR sweeps were acquired from eight  
29 mice and four human participants.

30 **Results:** To reach the critical lag value, weak responses at near-threshold levels

31 required more sweep averaging than strong responses at supra-threshold levels,  
32 allowing precise and robust determination of the ABR threshold. Moreover, by  
33 contrast to level averaging over fixed sweep number the algorithm saved up to 69 %  
34 and 36 % sweeps at supra-threshold sound levels for the threshold determination in  
35 mice and humans, respectively.

36 **Conclusion:** Implementation of this method in commercial devices will automate the  
37 ABR test in a more reliable and efficient fashion.

## 38 **Introduction**

39 The auditory brainstem responses (ABRs) are brain electrical potential changes due to  
40 synchronous neuronal activities evoked by supra-threshold acoustic stimuli ([Jewett et](#)  
41 [al., 1970](#)). These responses are detectable using non-invasive surface electrodes  
42 placed on the scalp of test subject. The ABR test is widely employed to assess the  
43 hearing function, particularly for infants, adults with learning disabilities and patients  
44 undergoing operation, to whom a test through communication or body movements is  
45 not applicable ([Jacobson et al., 1990](#)). Typical ABR waveform is composed of five  
46 peaks in the early onset of sound evoked potentials, corresponding to synchronous  
47 activities arising from auditory nerve, cochlear nucleus, superior olivary complex,  
48 lateral lemniscus and inferior colliculus, respectively. Thereby, features of the ABR  
49 waveform including peak latencies and amplitudes provide clinical-significant  
50 information, for instance hidden hearing loss ([Mehraei et al., 2016](#); [Ridley et al.,](#)  
51 [2018](#)), tinnitus ([Bramhall et al., 2018](#); [Castaneda et al., 2019](#)), site of lesions or  
52 tumors in the auditory system ([Roeser et al., 2007](#)) based on the way how the  
53 waveform is altered.

54 Although the ABR test itself is considered objective, the waveform recognition at  
55 near-threshold level is not always trivial. Currently, professionals are still required to  
56 supervise recording and interpret results, which account for the largest cost  
57 component of the test. Moreover, as accurate waveform recognition highly depends  
58 on the skill and the experience of the human assessors, often limited consensus occurs,  
59 especially when untypical waveform or high background noise are encountered

60 ([Vidler and Parkert, 2004](#)). As diagnosis of progressive and acquired hearing loss in  
61 preschool children ([Lu et al., 2014](#); [Lu et al., 2011](#)) and categorizing temporal  
62 threshold shifts caused by noise exposure ([Le Prell, 2019](#)) require comprehensive  
63 hearing screening with high accuracy and robustness, there is an increasing demand  
64 for automatic approaches making the ABR test less labor-intensive.

65 The fundamental challenge of automated ABR analysis is high-level noise  
66 contamination. In order to improve the signal-to-noise ratio (SNR) for unambiguous  
67 waveform recognition, averaging over hundreds of sweeps is exclusively required.  
68 Hence, ABR results are usually provided with statistical measures like well-known  
69 single- and multiple-point F-ratio ( $F_{sp}$  and  $F_{mp}$ ) for evaluating the signal and noise  
70 characteristics ([Don and Elberling, 1994](#); [Elberling and Don, 1984](#)). Over decades,  
71 several methods were proposed to automate the procedure. Feature-based strategies  
72 detect responses by quantifying the similarity of measured waveforms to either  
73 existing templates ([Valderrama et al., 2014](#)) or waveforms evoked by adjacent sound  
74 levels ([Suthakar and Liberman, 2019](#)), as well as by features learned by artificial  
75 neural network from human-annotated datasets ([Alpsan and Ozdamar, 1991](#);  
76 [McKearney and MacKinnon, 2019](#)). However, the detection accuracy is often limited  
77 owing to waveform heterogeneity, varying data quality, and inconsistent training data  
78 ([McKearney and MacKinnon, 2019](#)). Alternatively, statistics-based strategies quantify  
79 either inter-sweep variability using correlation function ([Bershad and Rockmore, 1974](#);  
80 [Weber and Fletcher, 1980](#); [Xu et al., 1995](#)) or the ‘signal quality’ through scoring  
81 procedures like F-ratios ([Don and Elberling, 1994](#); [Elberling and Don, 1984](#)), but

82 reliable response thresholding only is only obtained under a narrow range of  
83 experiment conditions. Although some approaches mentioned above have already  
84 been integrated in commercial devices, nowadays reliable threshold determination  
85 still involves human supervision due to frequent detection errors.

86 In this study, we first tried to calibrate the single-sweep covariance measurement  
87 for ABR waveform detection and observed large inter-trial variability of both pairwise  
88 correlation coefficient and  $F_{sp}$ -ratio at the threshold level, limiting the reliability and  
89 accuracy of this approach. Next, we bypassed this limitation by proposing a novel  
90 procedure, in which time-locked ABR was detected with fixed cross-covariance  
91 criterion from progressively averaged responses by iterations and the executed  
92 iteration counts versus level function was modeled to interpolate for the threshold  
93 level beyond the sampling resolution of level series. Mouse and human ABR results  
94 suggested that the algorithm outcomes matched the expert assessments with a  
95 maximal aberration of 5 dB. Besides, in our hands the algorithm required up to 69 %  
96 and 36 % fewer sweeps for threshold determination in mice and humans, respectively.  
97

98 **Materials and methods**

99 **Animals, human participants and ethics**

100 C57BL/6 mice were purchased from Sino-British SIPPR/BK Lab Animal Ltd.  
101 (Shanghai, China). The telomerase-knock-out mice were kindly donated by Prof. Lin  
102 Liu (Nankai University, China) and bred in house. Human participants were recruited  
103 from Shanghai Ninth People's Hospital and consent forms were signed before the  
104 experiment. This study is conduct at the Ear Institute and the Hearing and Speech  
105 Center of the hospital. All procedures were reviewed and approved by the Institutional  
106 Authority for Laboratory Animal Care (HKDL2018503) and the Hospital Ethics  
107 Committee for Medical Research (SH9H-2019-T79-1).

108

109 **ABR recording**

110 Mouse ABR sweeps were recorded using TDT RZ6/BioSigRZ system (Tuck-Davis  
111 Tech. Inc., US) in a sound-proof chamber. 7-week-old mice were anesthetized through  
112 intraperitoneal injection of hydrate chloride (500 mg/kg). During the recording,  
113 animal body temperature was maintained at 37 °C using a regulated heating pad  
114 (Harvard Apparatus, US) with rectal thermal probe. Electrical potentials were  
115 registered via subdermal needle electrodes (Rochester Electro-Med. Inc., US) placed  
116 at animal vertex (record electrode), left infra-auricular mastoid (reference electrode)  
117 and right shoulder region (ground electrode). 3-millisecond tone pips at 16 kHz were  
118 delivered via a multi-field magnetic speaker (Tuck-Davis Tech. Inc., US) positioned  
119 at 10 cm from the animal vertex. Evoked potentials upon repeated stimuli (20 Hz)

120 were sampled at 24 kHz. 500 sweeps were acquired at test sound level series starting  
121 from 90 to 0 dB with 5-dB decrement. For one animal (**Suppl. Figure 2**), we acquired  
122 potentials starting from +10 to -10 dB around predetermined threshold level with  
123 1-dB decrement.

124 Human ABRs were recorded using commercial ABR device (Intelligent Hearing  
125 Systems, US) with Smart EP software from four volunteers aged 21-29 years without  
126 preselection based on their medical conditions. Click sound stimulation (100  $\mu$ s  
127 duration, rectangular envelopes) was generated and presented monaurally through  
128 ER3 insert earphones with foam tips at a rate of 37.1/s with alternating polarity.  
129 Electrode impedance was less than 5 k $\Omega$  and interelectrode impedance was within  $\pm$ 1  
130 k $\Omega$ . Artifact rejection level was < 31% (rejection voltage 31  $\mu$ V) to reduce response  
131 contamination of high EEG levels and myogenic activities. The recorded potentials  
132 were sampled at 40 kHz and amplified by a factor of 100,000. 100 Hz (high-pass) and  
133 3000 Hz (low-pass) filters were applied. Average responses over 500, 1000, and 2000  
134 sweeps were acquired three times at level series starting from 60 to 0 dB with 5-dB  
135 step size.

136

### 137 **Single-sweep covariance analysis**

138 Mouse ABR sweeps were analyzed using self-written routines in MATLAB  
139 (MathWorks Inc., US). The rejection amplitude of artifacts was set to 55  $\mu$ V and a  
140 high-pass filter (smoothing splines with a smoothing parameter of 0.5) was applied to  
141 the raw recordings. The pairwise correlation coefficients were computed using

142 MATLAB function from 350 sweeps within a temporal window of 0-6 ms  
143 post-stimulation onset, resulting in 61,075 coefficients ( $350 \times 349 / 2$  sweep pairs) at  
144 each sound level. Histograms of the coefficients were fitted with shifted normal  
145 distributions.

146

#### 147 **Progressive sub-average cross-covariance analysis**

148 For mouse ABR, 350 sweeps were loaded progressively by seven iterations (50  
149 sweeps per executed iteration). In each iteration, sweeps were randomly subdivided  
150 into two groups for separated averaging. Cross-correlation between sub-averages was  
151 computed to measure the signal lag of the maximal correlation-coefficient.  
152 Time-locked responses were detected based on the criterion whether the measured lag  
153 was fewer than 1 data point (equivalent to 1% of the analyzed record length, 1-6 ms  
154 post-stimulation onset). In order to reject cases of coincidentally overlapped noise  
155 peaks with similar latency (false positives), three parallel runs were performed with  
156 regrouped sweeps. The executed iterations were counted to obtain the minimal sweep  
157 number required for detectable responses. The iteration upper limit was set to seven  
158 for total 350 recorded sweeps. Sigmoid and exponential function were employed to  
159 model the development of the normalized iteration counts ( $NC$ ) with the presentation  
160 level ( $S$ ). For modeling with sigmoid function (1), the best fit-parameter  $\alpha = 0.6$ . At  
161 function growth of 0.9 interpolation was perform to determine the threshold level ( $T$ ).  
162 For modeling with exponential function (2), the best fit-parameter  $\alpha' = 0.25$  and the  
163 function growth of 1 was used to interpolate for the threshold level.



164 
$$NC_S = \frac{1}{1+e^{-\alpha(S-T)}} \quad (1)$$

165 
$$NC_S = e^{-\alpha'(S-T)} \quad (2)$$

166 As for human ABR, average responses over 500, 1000 and 2000 sweeps were  
167 used as inputs for the algorithm variant (**Suppl. Figure 4A**). In each iteration three  
168 cross-correlation runs were performed with the combination of two out of three  
169 sub-averages which were updated with 500 more sweeps. The iteration upper limit  
170 was set to seven for maximum average over 3500 sweeps. Note that to generate  
171 average responses over 1500, 2500, 3000 and 3500 sweeps weighted averaging (3)  
172 was used, in which  $avg(M)$ ,  $avg(N)$  and  $avg(M+N)$  referred to averages over M, N  
173 and M plus N sweeps, respectively.

174 
$$avg(M + N) = \frac{M \cdot avg(M) + N \cdot avg(N)}{M + N} \quad (3)$$

175 The lag criterion for the time-locked component was fewer than 7 data points  
176 (equivalent to 2 % of the analyzed record length, 0-10 ms post-stimulation onset).  
177 Same as for the mouse ABR, 0.9 was used to interpolate for the threshold level on the  
178 best-fit sigmoid growth.

179

### 180 **Human assessment of ABR threshold**

181 Human ground truth of the ABR threshold was obtained from visual inspection of  
182 waveforms at level series by five clinicians independently. Each of them was provided  
183 with average responses either over fixed sweep number (the conventional averaging)  
184 or over those used in the algorithm (the algorithm averaging). They were supposed to  
185 determine the lowest level with the presence of ABR waveform. They were blinded to

186 the test subject identities and the assessments from others. Means of the determined

187 thresholds were used as ground truth to compare with algorithm outcomes.

188 **Results**

189 **ABR Thresholding by covariance analysis of single-sweeps**

190 ABRs are usually embedded in high-level background activities and system noise,  
191 and thereby smooth baseline and clear waveform, if present, require averaging over  
192 hundreds of sweeps. To generate test datasets, we recorded from mice single-sweeps  
193 upon 16 kHz tone-pips at different sound levels (**Figure 1A**). After exclusion of those  
194 with movement-induced excessive amplitudes, more than 350 sweeps were obtained  
195 and filtered sequentially through a high-pass filter ([Nishida et al., 1993](#)) to remove  
196 low frequency fluctuations in the short-latency component (**Suppl. Figure 1**). At each  
197 presentation level, pairwise correlation-coefficients (CCs, a statistical measure of  
198 waveform similarity) were sampled. Positively shifted distributions were obtained  
199 with increased sound levels, indicating elevated degrees of correlation (**Figure 1B**).  
200 Together with prior study ([Galbraith, 2001](#)), this result suggests that single-sweeps of  
201 supra-threshold ABRs are highly correlated.

202       Next, we attempted to calibrate the CC criterion for reliable ABR thresholding.  
203 Recordings were performed at level series starting from 90 to 0 dB on three wild-type  
204 (wt) of normal hearing and five telomerase-knock-out mice ( $terc^{-/-}$ ) with high risk of  
205 deafness. Example ABR runs were illustrated in **Figure 2A** and the medians (peak  
206 positions) of pairwise CCs were plotted as a function of the level series (**Figure 2B**).  
207 Shifted rising phases of about 30 dB were observed when compared the CC median –  
208 level function of the  $terc^{-/-}$  animal to that of the wt animal, consistent with the elevated  
209 threshold of the  $terc^{-/-}$  animal. Together with early theoretical work ([Bershad and](#)

210 [Rockmore, 1974](#)), this result confirmed CC as a promising measure for detecting  
211 supra-threshold responses. In order to obtain the boundary value of CC for  
212 supra-threshold responses, we plotted the CC medians as a function of levels relative  
213 to the human-determined thresholds (**Figure 2C**). Large inter-trial variability ( $0.0119$   
214  $\pm 0.0034$ , mean  $\pm$  s.d.), which was presumably caused varying SNRs of recordings  
215 under different experimental conditions (such as electrode position, depth of  
216 anesthesia, etc.), was observed and compromised a reliable ABR thresholding via this  
217 approach. Similarly, when  $F_{sp}$ -ratio was employed in the replacement of CC (**Figure**  
218 **2D & E**), large variation ( $3.09 \pm 1.53$ , mean  $\pm$  s.d.) persisted in the measured  
219  $F_{sp}$ -ratios at the threshold level.

220

### 221 **Threshold detection using cross-correlation test during ongoing averaging**

222 It had been shown above that both CC and  $F_{sp}$ -ratio measured at the threshold level  
223 differed from trial to trial, presumably due to varying SNRs of recordings. Within  
224 each trial, however, constant noise level is expected and weak response thereby  
225 requires more averaging than strong response to reach the same SNR level. Based on  
226 this idea, we designed a novel procedure for threshold determination by modeling the  
227 minimal required sweep number for an average response to reach stationary SNR  
228 criterion as a function of level series (**Figure 3A**). In detail, single-sweeps were  
229 randomly divided into two groups (**Figure 3A – (I)**) and the signal lag for maximal  
230 peak overlap between group averages (**Figure 3B** for averages of all sweeps; **Figure**  
231 **3C** for sub-averages) was searched using cross-correlation function (**Figure 3A – (II)**).

232 For time-locked ABRs, irrespective of waveform and amplitude, a neglectable lag  
233 (here the lag criterion  $k < 1$  data point) was expected (**Figure 3A – (III)**, see **Figure**  
234 **3D** for measured lags between sub-averages). To reject false positives caused by  
235 coincidentally overlapped noise peaks with similar latency, three parallel runs were  
236 performed with regrouping. Upon detection of time-locked response, the procedure  
237 was then repeated with sweeps recorded at lower sound level; when time-locked  
238 response was under detected or absent, additional sweeps were added iteratively to  
239 increase total number for the random-split averaging until the iteration upper limit  
240 ( $I_{\max} = 7$ ) was reached (**Figure 3A – (IV)**). As illustrated in **Figure 3E**, we found that  
241 the counts of executed iterations increased rapidly when approaching to the threshold  
242 level. That was expected, because to reach the lag criterion weak responses of small  
243 amplitudes required more sweep averaging to suppress noise peaks. Here the iteration  
244 upper limit was crucial to avoid infinity iterations, as time-locked responses were  
245 absent from the averages at sub-threshold levels.

246 So far, we showed that this procedure was able to determine the lowest  
247 supra-threshold level (last level with iteration counts fewer than upper limit) and  
248 highest sub-threshold level (first level with reached iteration upper limit). Further  
249 attempt was made to interpolate for the threshold beyond the step size of sampled  
250 levels (**Figure 3F**). From one animal, we acquired single-sweeps with level series of  
251 1-dB- instead of 5-dB step size. By fitting the rising phase of the normalized iteration  
252 counts with different functions, the threshold was found at 1 on the exponential  
253 growth and 0.9 on the sigmoid growth (**Suppl. Figure 2**). In our hands, fitting with

254 sigmoid function was more reliable than that of exponential function, especially when  
255 limited data points were present at the rising phase. Thus, we used 0.9 on the sigmoid  
256 growth for threshold interpolation with 5-dB-spaced level series. In addition, this  
257 procedure was not limited to the detection method of ABR waveform. Similar results  
258 were obtained when measured mean  $F_{sp}$ -ratio at the threshold ( $F_{sp}$ -threshold = 3.09,  
259 **Figure 2E**) was utilized in the replacement of the lag criterion for response detection  
260 (**Suppl. Figure 3**).

261

### 262 **Accuracy and efficiency of the new method for threshold determination**

263 To evaluate the performance of the new method, we compared the  
264 algorithm-determined thresholds with human ground-truth on both mouse and human  
265 ABR. Note that for human ABR, sub-averages were separately acquired instead of  
266 generated by random-split averaging, as single-sweep registration mode was not  
267 applicable on the commercial devices we used (see **Suppl. Figure 4A** for the  
268 modified flowchart and **Materials and Methods** for details). Close matches were  
269 found between the algorithm-determined thresholds and the readouts of five  
270 independent clinicians ( $2.5 \pm 1.6$  dB for mouse ABR and  $0.75 \pm 0.95$  for human ABR,  
271 mean  $\pm$  s.d., **Figure 4A** & **Suppl. Figure 5A**), suggesting a detection accuracy of  
272 near-human-performance. Besides, upon detected responses ongoing averaging was  
273 stopped by the algorithm at supra-threshold levels and fewer sweeps in a  
274 response-amplitude-dependent manner did not appear to influence the waveform  
275 recognition by human (**Figure 4B** & **Suppl. Figure 5B**). When compared to

276 averaging with fixed sweep number, the new method required  $69.39 \pm 17.45$  % and  
277  $36.19 \pm 17.53$  % (mean  $\pm$  s.d.) fewer sweeps in mouse and human ABR, respectively,  
278 without compromising the detection accuracy (**Figure. 4C & Suppl. Figure 5C**).  
279

## 280 Discussion

281 Since decades attempts have been made to automate ABR analysis. Several  
282 techniques were proposed including correlation function for detecting time-locked  
283 waveform in random fluctuations. In this study, we first reinvestigated the pairwise  
284 CCs of single-sweeps as a function of level series: (1) constant peak broadening of  
285 CC distributions across sound levels was observed (**Figure 1B**). Considering the  
286 broadening as a consequence of random correlation and anti-correlation of noise  
287 peaks with evoked responses, this result implied high fidelity of auditory transmission  
288 and stable noise level for single experiment; (2) within single recording session, CC  
289 peak position increased monotonically with elevated test sound level (**Figure 2B**).  
290 Often slow increase or even decline in CCs was observed at 30 dB above the  
291 threshold level. The reason was unclear and might suggest none-linear change of  
292 response peak amplitudes at those levels; (3) the obtained CCs at the threshold level  
293 showed large trial-to-trial variations (**Figure 2C**). Together with similar result of  
294 quantification using  $F_{sp}$ -ratio (**Figure 2D & E**), we concluded that this approach is  
295 sensitive to experimental settings (for instance electrode position, anesthesia depth,  
296 etc.) and thereby may not be suitable for reliable response detection across multiple  
297 test subjects or recording sessions.

298 To bypass this limitation, we proposed a novel strategy. While keeping a  
299 stationary waveform detection criterion, we asked the minimal sweep number for an  
300 average response to reach that criterion and in turn the threshold was informed by  
301 development of this number with level series. By contrast to prior studies, in which



302 signal lag of maximal correlation was used to detect auditory evoked responses in two  
303 consecutive recordings ([Xu et al., 1995](#)), here the lag criterion was applied to  
304 random-split averaged responses, so that multiple test runs were possible by  
305 regrouping. At near-threshold levels, we observed a fast increase of the minimal  
306 sweep number (reported as the executed iteration counts in the algorithm) for  
307 sub-averaged responses to reach the lag criterion (**Figure 3F**). Since varying noise  
308 level only contributes to the baseline sweep numbers, the location of the characteristic  
309 fast rising is supposed to be threshold-specific and insensitive in different  
310 experimental trials. Besides, neither the selection of the lag criterion nor maximal  
311 iteration number played critical role for the threshold determination, because the  
312 measured lags were much larger at sub-threshold than supra-threshold level (**Figure**  
313 **3D**) and shifting iteration upper limit caused only little change of the corresponding  
314 level due to the exponential-like growth (**Figure 3E, Suppl. Figure 2**). These features  
315 made our approach robust and almost calibration-free. Next, we showed that precise  
316 threshold determination was possible by modeling and interpolation beyond the 5-dB  
317 step size of sampled levels (**Figure 3F**), in our case up to 1 dB. Further development  
318 of this method is to combine with sampling strategy of progressively reduced level  
319 step size and increased sweep averaging per iteration at near-threshold sound levels in  
320 order to estimate the model in a more precise and efficient way ([Cebulla and](#)  
321 [Sturzebecher, 2015](#)).

322 For both mouse and human ABR, the new method was proven reliable in  
323 threshold determination and required fewer sweeps at supra-threshold levels. This

324 selective reduction did not cause increased difficulty in waveform assessment by  
325 human (**Figure 4B & Suppl. Figure 5B**), as SNR of responses at near-threshold is  
326 most crucial for the threshold determination. Such feature is attractive in two respects.  
327 First, it provides minimal quality control for unambiguous waveform recognition for  
328 both human and machine. Further, standardized data will benefit  
329 machine-learning-based approaches by minimizing discrepancy in training data  
330 ([McKearney and MacKinnon, 2019](#)). Second, when to stop averaging is an important  
331 decision to make during ABR recording, the new method not only makes the ABR test  
332 more efficient by avoiding prolonged acquisition and redundant data, but also  
333 specifies the confidence level of waveform interpretation ([Don and Elberling, 1996](#);  
334 [Madsen et al., 2018](#)). Based on our quantification, up to 69 % sweeps in mouse ABR  
335 and 36 % in human ABR were saved when ongoing averaging was stopping upon  
336 detected responses (**Figure 4C & Suppl. Figure 5C**), implying the potentials of  
337 bursting the regular ABR test in speed and efficiency.  
338

339 **Acknowledgements**

340 We would like to thank Yun Li, Kun Han, Yan Ren, Lu Yang and Haifeng Li from  
341 Shanghai Ninth People's Hospital for help with ABR assessment. We would like to  
342 thank Drs. Guangming Chen and Lin Liu for providing  $terc^{-/-}$  mice. This study was  
343 supported by The Program for Professor of Special Appointment (Eastern Scholar) at  
344 Shanghai Institutions of Higher Learning (QD2018015 to Y.H.), Elite Program at  
345 Shanghai Ninth People's Hospital (JY201802 to Y.H., Z.H.), The National Science  
346 Foundation for Young Scientists of China (81800901 to Y.H., 81700903 to B.L) and  
347 SHIPM-mu Fund (JC201808 to B.L.).

348

349 **Declarations of interest**

350 The authors have declared that no conflicts of interest exist.

351

352 **Author contribution**

353 Y.H., H.W. conceptualized and supervised the study. B.L., X.D. acquired the ABR  
354 data; Y.H., H.Y.W. designed the algorithm; Y.H., H.Y.W., X.W., Z.H. analyzed and  
355 interpreted the data. Y.H., H.Y.W. wrote the manuscript with help of B.L. and X.D.;

356 All authors commented on the manuscript.

357

358 **Figure Legends**

359 **Figure 1.** Pairwise CCs of single-sweep mouse ABRs. (A) Example sweeps recorded  
360 at four different sound levels (grey lines). Average responses (colored lines) were

361 obtained from 350 sweeps. **(B)** Distributions of pairwise CCs from (A) were fitted  
362 with normal distributions (colored lines, mean full-width-at-half-maximum was  
363  $0.1778 \pm 0.0154$ , mean  $\pm$  s.d.) with varying peak positions.

364

365 **Figure 2.** Quantification of pairwise CC and  $F_{sp}$ -ratio at the threshold level. **(A)**

366 Example average responses of 350 sweeps recorded from a wt animal (black lines)

367 and a *terc*<sup>-/-</sup> animal (red lines). Attenuated ABR amplitudes were observed: > 25 dB

368 for the wt animal (pointed by black asterisk) and > 55 dB for the *terc*<sup>-/-</sup> animal

369 (pointed by double red asterisks). **(B)** Plot of the pairwise CC medians vs. the level

370 series. A shifted rising of CCs by about 30 dB in level was observed between the wt

371 (black dots) and the *terc*<sup>-/-</sup> animal (red cycles). **(C)** Plot of pairwise CC medians vs.

372 levels relative to the threshold. Datasets of three wt (black dots) and five *terc*<sup>-/-</sup> animal

373 (red cycles) were centered to the human-determined thresholds (pointed by asterisks).

374 Mean of CC medians at the threshold (level = 0) was  $0.0119 \pm 0.0034$  (mean  $\pm$  s.d.,

375 varying from 0.0090 to 0.0199). **(D)** Similar to (B), plot of  $F_{sp}$ -ratios vs. the level

376 series. **(E)** Similar to (C), plot of  $F_{sp}$ -ratios vs. levels relative to the threshold. Mean of

377  $F_{sp}$ -ratios at the threshold was  $3.09 \pm 1.53$  (mean  $\pm$  s.d.).

378

379 **Figure 3.** Progressive sub-average cross-covariance test of mouse ABR. **(A)**

380 Flowchart of the algorithm, in which argA, argB, argC referred to the subgroup

381 averages (I), xcorr the cross-correlation operation (II), k the lag criterion for

382 time-locked responses (here k = 1 data point, 1% of record length, III), r1, r2, r3 the

383 outcomes of three parallel runs, as well as  $I_{\max}$  the iteration upper limit ( $I_{\max} = 7$  for  
384 total 350 sweeps, IV). **(B)** Example average responses of 350 single-sweeps recorded  
385 from mouse. The human-assessed threshold was 30 dB (black asterisk). **(C)** Averaged  
386 responses (black and grey lines) of random-split sweeps at the level series. **(D)** Mean  
387 lags for maximal overlap between sub-averages from three parallel cross-correlation  
388 runs were plotted as a function of the level series. At supra-threshold levels (dots)  
389 small lags were obtained, while large amplitude and significant inter-trial variability  
390 ( $31.11 \pm 16.12$  data points, mean  $\pm$  s.d.) were observed at sub-threshold levels  
391 (cycles). **(E)** Increased number of sweeps (50 sweeps per iteration) were used for  
392 random-split averaging, until the lag criterion ( $k < 1$  data point) was fulfilled.  
393 Executed iteration counts (dots) were plotted as a function of the level series. If the  
394 iteration upper limit ( $I_{\max}$ , dash red line) was reached at two consecutive levels  
395 (cycles), the time-locked response was considered absent from the average and the  
396 algorithm was aborted to stop testing at lower levels (triangles). **(F)** The normalized  
397 iteration counts vs. level function was fitted by a sigmoid function and 0.9 on the  
398 growth was used to interpolate for the ABR threshold between adjacent levels (see  
399 **Suppl. Figure 2** for the calibration).

400

401 **Figure 4.** Performance of the new method on mouse ABR. **(A & B)** Average  
402 responses ( $n = 8$ ) were generated by averaging total 350 sweeps (A, conventional  
403 averaging) or those used in the executed iterations (B, algorithm averaging). The  
404 mean thresholds determined independently by five clinicians were consistent with the

405 algorithm outcomes (aberration  $\delta = 2.50 \pm 1.60$  dB in A and  $2.13 \pm 2.47$  dB in B,  
406 mean  $\pm$  s.d.). Linear fit: adjust  $R^2 = 0.9587$  in A and  $0.9713$  in B. (C) Comparison  
407 between the sweep number used in the conventional averaging (left bar) and the  
408 algorithm averaging (right bar). Note that the sweeps were counted at all  
409 supra-threshold and two highest sub-threshold level for both averaging modes. The  
410 algorithm averaging used  $69.39 \pm 17.45$  % (mean  $\pm$  s.d.) fewer sweeps than the  
411 conventional averaging.

412

### 413 **References**

414

415 Alpsan, D., and Ozdamar, O. (1991). Brain-Stem Auditory Evoked-Potential Classification by  
416 Backpropagation Networks. *IEEE Trans Acoust Speech Signal Process*, 39, 1266-1271.

417 Bershad, N.J., and Rockmore, A.J. (1974). On estimating signal-to-noise ratio using the sample  
418 correlation coefficient. *IEEE Trans Inf Theory* *IT-20*, 112-113.

419 Bramhall, N.F., Konrad-Martin, D., and McMillan, G.P. (2018). Tinnitus and Auditory Perception After a  
420 History of Noise Exposure: Relationship to Auditory Brainstem Response Measures. *Ear Hear* *39*,  
421 881-894.

422 Castaneda, R., Natarajan, S., Yule Jeong, S., Na Hong, B., and Ho Kang, T. (2019). Electrophysiological  
423 changes in auditory evoked potentials in rats with salicylate-induced tinnitus. *Brain Res*.

424 Cebulla, M., and Sturzebecher, E. (2015). Automated auditory response detection: Further  
425 improvement of the statistical test strategy by using progressive test steps of iteration. *Int J Audiol* *54*,  
426 568-572.

427 Don, M., and Elberling, C. (1994). Evaluating residual background noise in human auditory brain-stem  
428 responses. *J Acoust Soc Am* *96*, 2746-2757.

429 Don, M., and Elberling, C. (1996). Use of quantitative measures of auditory brain-stem response peak  
430 amplitude and residual background noise in the decision to stop averaging. *J Acoust Soc Am* *99*,  
431 491-499.

432 Elberling, C., and Don, M. (1984). Quality estimation of averaged auditory brainstem responses. *Scand*  
433 *Audiol* *13*, 187-197.

434 Galbraith, G.C. (2001). Enhanced brainstem and cortical evoked response amplitudes: single-trial  
435 covariance analysis. *Percept Mot Skills* *92*, 659-672.

436 Jacobson, J.T., Jacobson, C.A., and Spahr, R.C. (1990). Automated and conventional ABR screening  
437 techniques in high-risk infants. *J Am Acad Audiol* *1*, 187-195.

438 Jewett, D.L., Romano, M.N., and Williston, J.S. (1970). Human auditory evoked potentials: possible  
439 brain stem components detected on the scalp. *Science* *167*, 1517-1518.

440 Le Prell, C.G. (2019). Effects of noise exposure on auditory brainstem response and speech-in-noise

441 tasks: a review of the literature. *Int J Audiol* 58, S3-S32.

442 Lu, J., Huang, Z., Ma, Y., Li, Y., Mei, L., Yao, G., Wang, Y., Shen, X., and Wu, H. (2014). Comparison  
443 between hearing screening-detected cases and sporadic cases of delayed-onset hearing loss in  
444 preschool-age children. *Int J Audiol* 53, 229-234.

445 Lu, J., Huang, Z., Yang, T., Li, Y., Mei, L., Xiang, M., Chai, Y., Li, X., Li, L., Yao, G., *et al.* (2011). Screening  
446 for delayed-onset hearing loss in preschool children who previously passed the newborn hearing  
447 screening. *Int J Pediatr Otorhinolaryngol* 75, 1045-1049.

448 Madsen, S.M.K., Harte, J.M., Elberling, C., and Dau, T. (2018). Accuracy of averaged auditory brainstem  
449 response amplitude and latency estimates. *Int J Audiol* 57, 345-353.

450 McKearney, R.M., and MacKinnon, R.C. (2019). Objective auditory brainstem response classification  
451 using machine learning. *Int J Audiol*, 1-7.

452 Mehraei, G., Hickox, A.E., Bharadwaj, H.M., Goldberg, H., Verhulst, S., Liberman, M.C., and  
453 Shinn-Cunningham, B.G. (2016). Auditory Brainstem Response Latency in Noise as a Marker of  
454 Cochlear Synaptopathy. *J Neurosci* 36, 3755-3764.

455 Nishida, S., Nakamura, M., and Shibasaki, H. (1993). Method for single-trial recording of  
456 somatosensory evoked potentials. *J Biomed Eng* 15, 257-262.

457 Ridley, C.L., Kopun, J.G., Neely, S.T., Gorga, M.P., and Rasetshwane, D.M. (2018). Using Thresholds in  
458 Noise to Identify Hidden Hearing Loss in Humans. *Ear Hear* 39, 829-844.

459 Roeser, R.J., Valente, M., and Hosford-Dunn, H. (2007). *Audiology. Diagnosis*, 2nd edn (New York:  
460 Thieme).

461 Suthakar, K., and Liberman, M.C. (2019). A simple algorithm for objective threshold determination of  
462 auditory brainstem responses. *Hear Res* 381, 107782.

463 Valderrama, J.T., de la Torre, A., Alvarez, I., Segura, J.C., Thornton, A.R., Sainz, M., and Vargas, J.L.  
464 (2014). Automatic quality assessment and peak identification of auditory brainstem responses with  
465 fitted parametric peaks. *Comput Methods Programs Biomed* 114, 262-275.

466 Vidler, M., and Parkert, D. (2004). Auditory brainstem response threshold estimation: subjective  
467 threshold estimation by experienced clinicians in a computer simulation of the clinical test. *Int J Audiol*  
468 43, 417-429.

469 Weber, B.A., and Fletcher, G.L. (1980). A computerized scoring procedure for auditory brainstem  
470 response audiometry. *Ear Hear* 1, 233-236.

471 Xu, Z.M., De Vel, E., Vinck, B., and Van Cauwenberge, P. (1995). Application of cross-correlation  
472 function in the evaluation of objective MLR thresholds in the low and middle frequencies. *Scand*  
473 *Audiol* 24, 231-236.

474

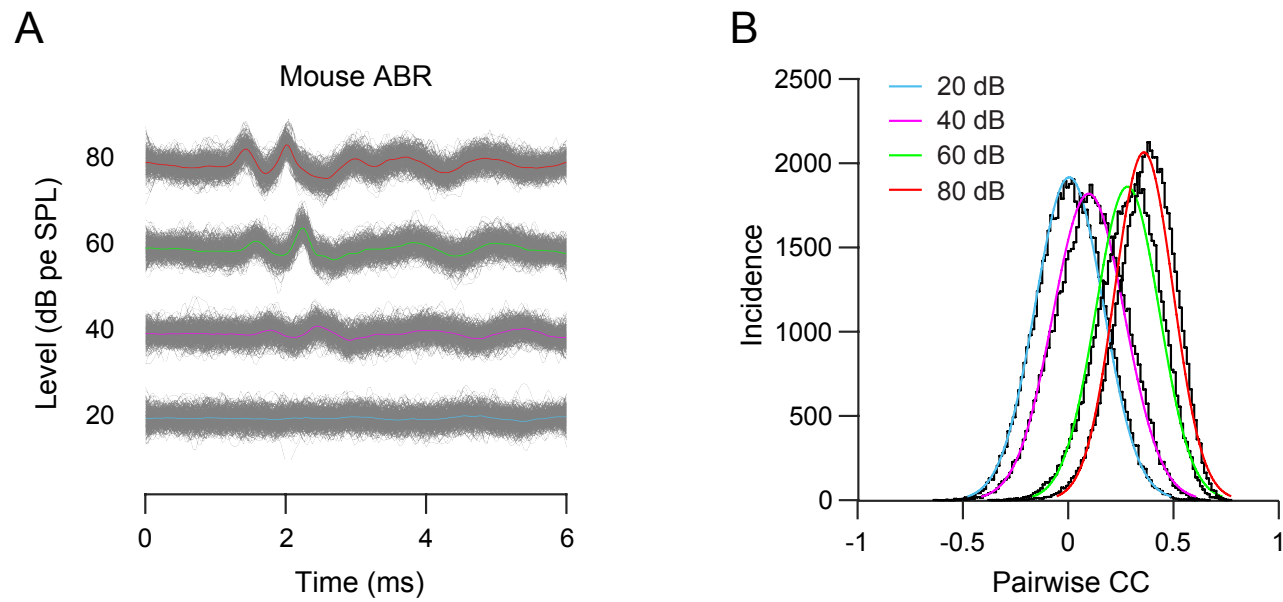

Wang et al., Fig 1



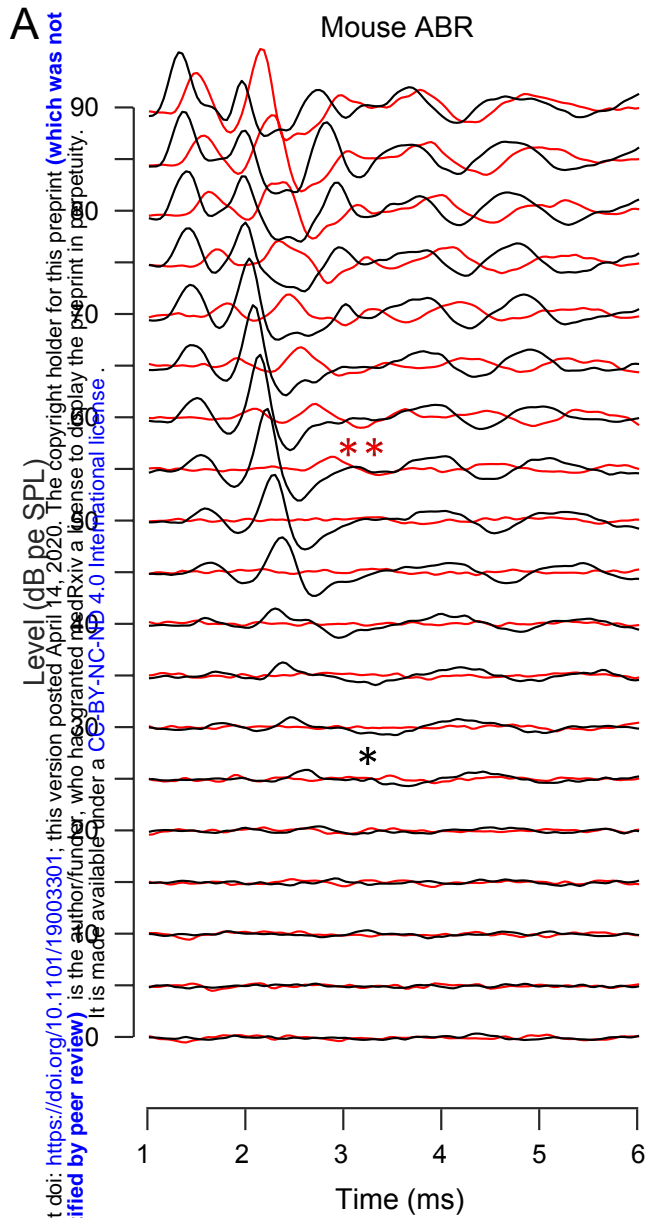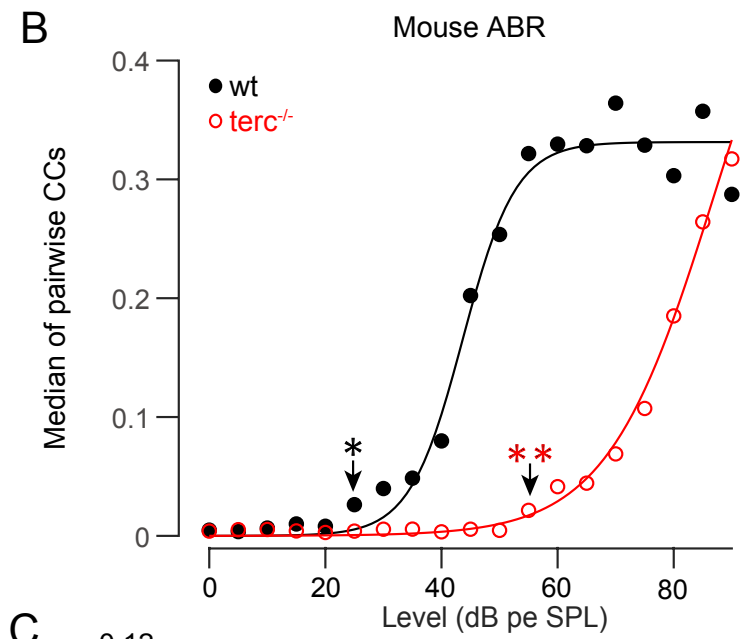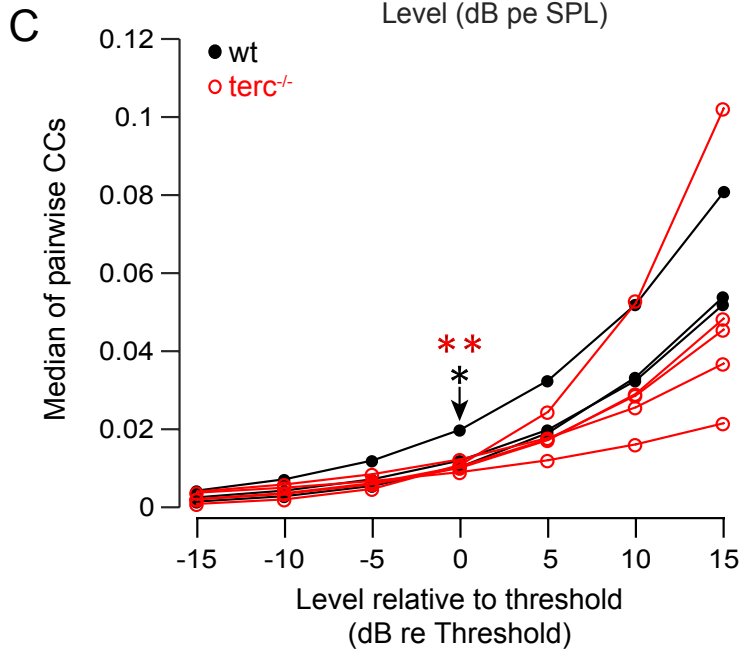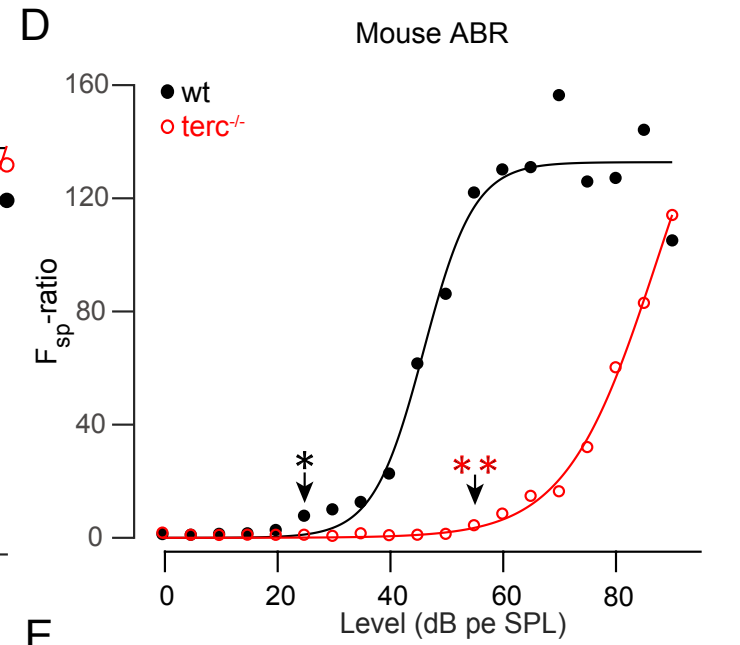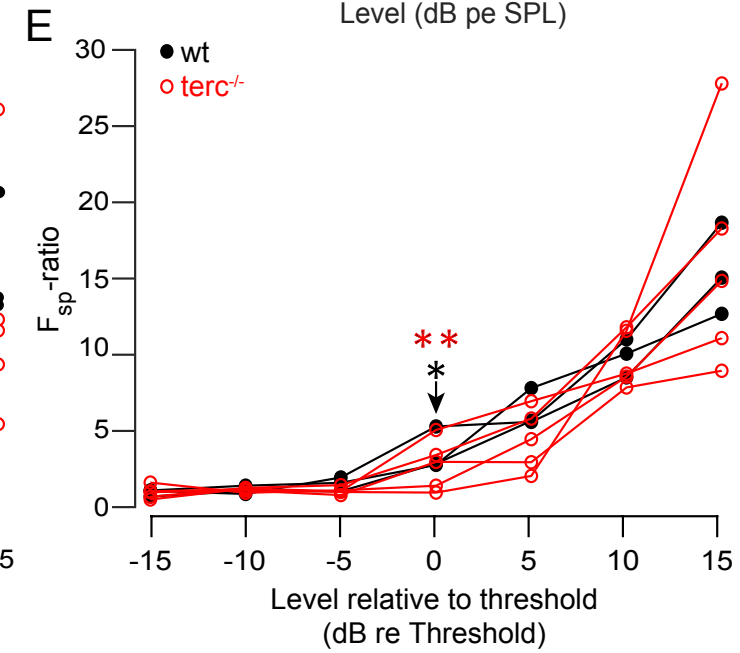

Wang et al., Fig 2

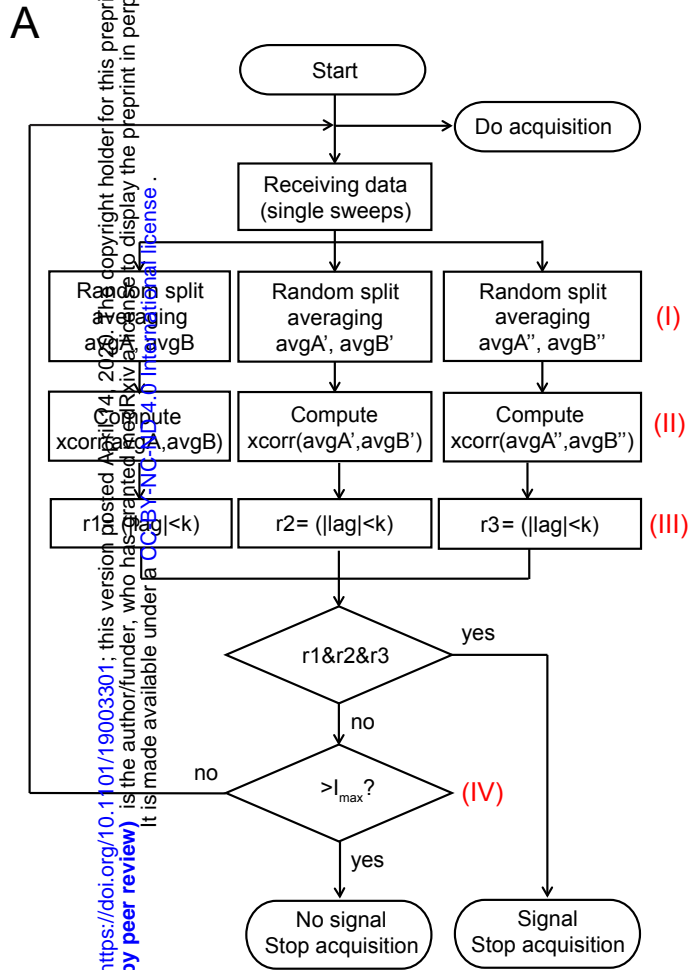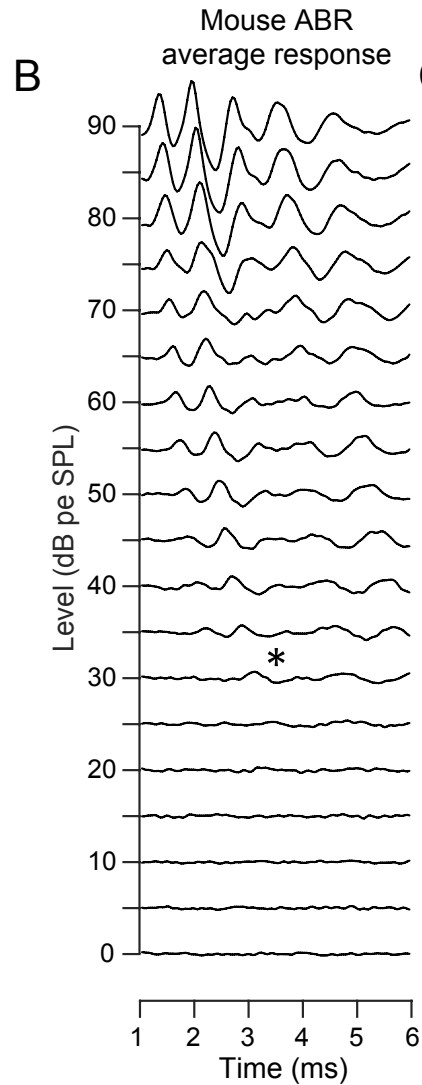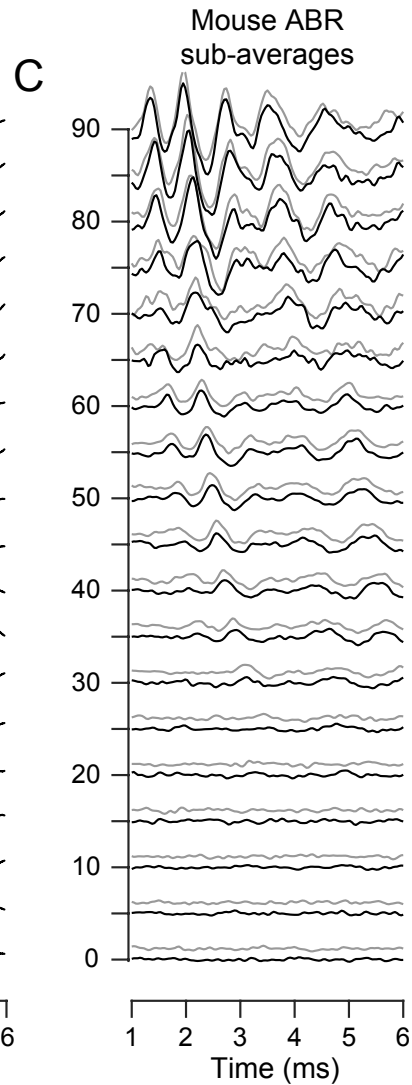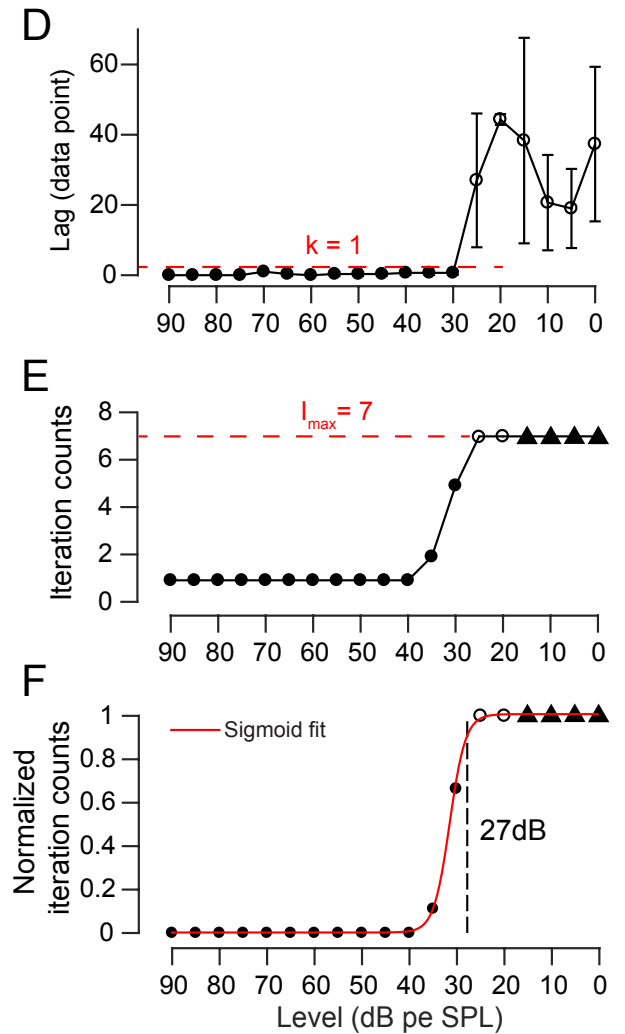

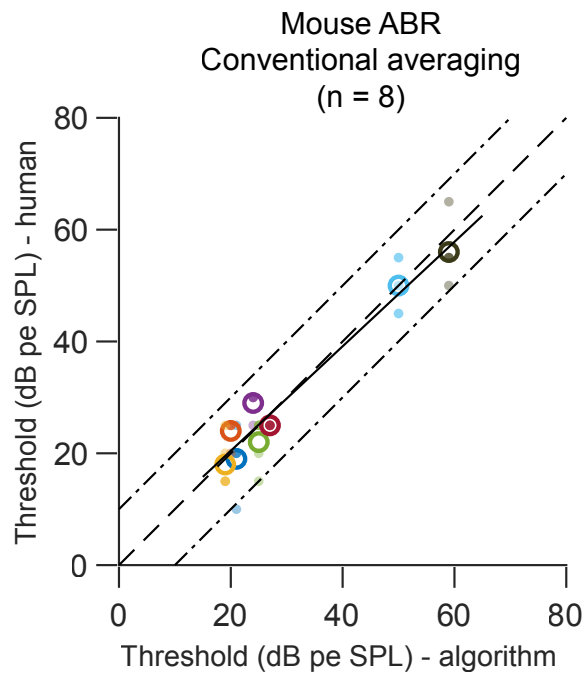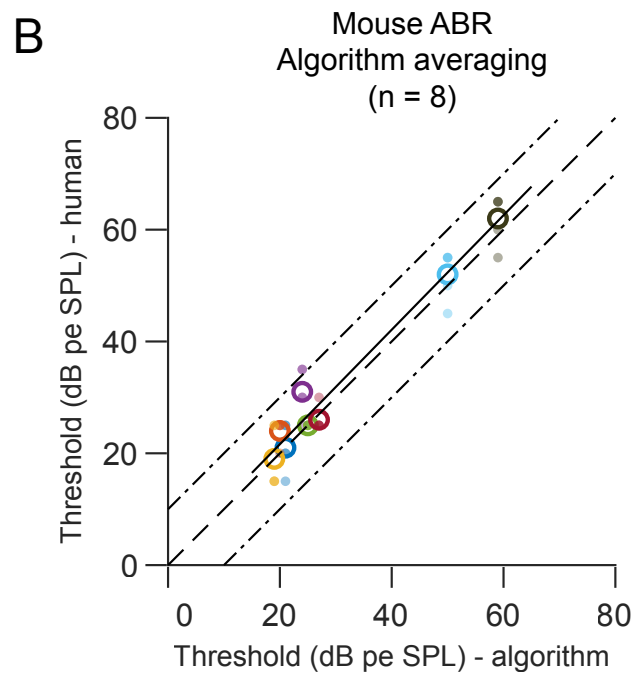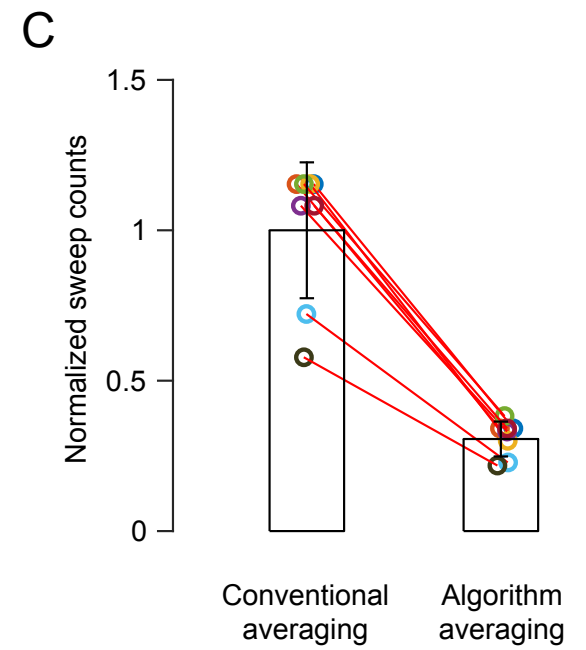

Wang et al., Fig 4
